1 Evaluation of imputation performance of multiple reference panels in a Pakistani population

2

3 Jiayi Xu<sup>1\*</sup>, Dongjing Liu<sup>2</sup>, Arsalan Hassan<sup>3,4</sup>, Giulio Genovese<sup>5,6,7</sup>, Alanna C. Cote<sup>2</sup>, Brian  
4 Fennessy<sup>2</sup>, Esther Cheng<sup>2</sup>, Alexander W. Charney<sup>2</sup>, James A. Knowles<sup>8</sup>, Muhammad Ayub<sup>9</sup>,  
5 Roseann E. Peterson<sup>10</sup>, Tim B. Bigdeli<sup>10</sup>, Laura M. Huckins<sup>1\*</sup>

6

7 1. Department of Psychiatry, Yale School of Medicine, New Haven, CT, USA

8 2. Icahn School of Medicine at Mount Sinai, New York, NY, USA

9 3. University of Peshawar, Peshawar, Khyber Pakhtunkhwa, Pakistan

10 4. Institute of Omics and Health Research, Lahore, Pakistan

11 5. Program in Medical and Population Genetics, Broad Institute of MIT and Harvard,  
12 Cambridge, MA, USA

13 6. Stanley Center, Broad Institute of MIT and Harvard, Cambridge, MA, USA

14 7. Department of Genetics, Harvard Medical School, Boston, MA, USA

15 8. The Human Genetics Institute of New Jersey, Rutgers University, Piscataway, NJ, USA

16 9. University College London, London, UK

17 10. Department of Psychiatry and Behavioral Sciences, Institute for Genomics in Health,  
18 State University of New York Downstate Health Sciences University, Brooklyn, NY, USA

19

20 \*Corresponding authors

21 Correspondence should be addressed to Laura M. Huckins, PhD: [laura.huckins@yale.edu](mailto:laura.huckins@yale.edu);

22 Jiayi Xu, PhD: [jiayi.xu@yale.edu](mailto:jiayi.xu@yale.edu).

23

24

25 **Abstract**

26 Genotype imputation is crucial for GWAS, but reference panels and existing benchmarking  
27 studies prioritize European individuals. Consequently, it is unclear which publicly available  
28 reference panel should be used for Pakistani individuals, and whether ancestry composition or  
29 sample size of the panel matters more for imputation accuracy. Our study compared different  
30 reference panels to impute genotype data in 1814 Pakistani individuals, finding the best  
31 performance balancing accuracy and coverage with meta-imputation with TOPMed and the  
32 expanded 1000 Genomes (ex1KG) reference. Imputation accuracy of ex1KG outperformed  
33 TOPMed despite its 30-fold smaller sample size, supporting efforts to create future panels with  
34 diverse populations.

35

36 **Keywords:**

37 Genetics, Genome-Wide Association Studies, Imputation, Imputation Panels, South Asian  
38 Ancestry, Pakistan.

39

40

41

42

43

44

45

46

47

48

49

50

## 51 **Background**

52 Genotype imputation allows easy, accurate, and significant increases in the number of  
53 variants available for genome wide association studies (GWAS), facilitating data harmonization  
54 and meta-analyses across cohorts and genotyping platforms, as well as statistical fine-mapping  
55 (1).

56 Currently, >85% of GWAS comprise individuals of European ancestry (EUR) (2), and  
57 available reference panels are predominantly European. Inclusion of non-EUR populations is  
58 critical to increase equity in genetic research (3) and advance understanding of genetic  
59 architecture of disease. Individuals of South Asian (SAS) ancestry, especially those in Pakistan,  
60 are severely under-represented in genetic studies, with few published GWAS (4). While  
61 imputation accuracy has been evaluated in an Indian population (5), no study has yet assessed  
62 imputation accuracy in Pakistani individuals based on reference panels (i.e., TOPMed (6), high-  
63 coverage expanded 1000 Genomes (ex1KG) (7), low-coverage 1000 Genomes (1KG) (8),  
64 GenomeAsia (9)). These panels include a small proportion of Pakistani samples, suggesting  
65 limited utility to studies of Pakistani populations and as-yet-determined imputation accuracy.  
66 Although TOPMed is by far the largest imputation panel (N = 97,256), only 0.1% are Pakistani  
67 individuals (n=139) (6,10). The ex1KG and GenomeAsia-Pilot panels have 146 and 113  
68 Pakistani samples with a total sample size of 3,202 and 1,739, respectively (7,9).

69 Here, we compare accuracy of imputation panels in a cohort of 1814 Pakistani  
70 individuals. We include comparison of true  $R^2$  ( $R^2_{True}$  through leveraging targeted sequencing  
71 data) and estimated  $R^2$  ( $R^2_{Est}$ ). We assess 5 imputation panels, including TOPMed, ex1KG,  
72 1000G GRCh38 (1KG38), 1000G GRCh37 SAS (1KG37-SAS), GenomeAsia-Pilot, as well as a  
73 meta-imputation approach combining TOPMed and ex1KG (meta). In this study, we for the first  
74 time examine which of the publicly available panels yields the best performance for Pakistani  
75 populations, whether merging existing panels further improves imputation accuracy, and  
76 whether ancestry or sample size is a more critical determinant of imputation accuracy.

## 77 Results and Discussion

78 We initially evaluated imputation accuracy among common variants (minor allele  
79 frequency (MAF)  $\geq 1\%$  in the Pakistani individuals). To evaluate the imputation accuracy  
80 against true genotypes, 1748 Pakistani individuals in this study (96%) also have sequenced  
81 genotype data via targeted sequencing. When comparing the imputed genotypes to targeted  
82 sequencing data, broadly, there was no difference in imputation accuracy for common variants  
83 across the six panels except for MAF bins of (0.01, 0.015] and (0.4, 0.5] (Figure 1a, average  
84  $R_{True}^2 = 0.61-0.91$  across MAF bins of common variants). Genome-wide, including variants for  
85 which we do not have matched targeted sequencing data, ex1KG and meta-imputation had the  
86 highest imputation accuracy ( $R_{Est}^2$ ) for common variants (mean  $R_{Est}^2 = 0.75 - 0.94$ ,  $0.74 - 0.93$   
87 respectively), while GenomeAsia-Pilot and 1KG37-SAS panels had the lowest imputation  
88 accuracy ( $R_{Est}^2 = 0.62-0.86$ ,  $0.64-0.86$  respectively, Figures 2a). ex1KG also had the highest  
89 imputation accuracy measured via empirical  $R^2$  ( $R_{Emp}^2$ ) for single nucleotide polymorphisms  
90 (SNPs) that were both imputed and genotyped on the Illumina Infinium Global Screening Array  
91 (GSA) (Fig. S9).

92 Next, we evaluated which imputation panel offered the best coverage for imputation of  
93 common variants, defined as percentage of targeted sequencing SNPs that were also imputed  
94 by a specific imputation panel. 90.9% - 99.4% of common variants called in our targeted  
95 sequencing data were included in at least one imputation panel (Figure 1b), of which 61.3%  
96 (GenomeAsia-Pilot) to 83.8% (meta-imputation) were well-imputed ( $R_{Est}^2 \geq 0.8$ ) (Figure 1e). In  
97 particular, among the 1896 common variants through targeted sequencing, 1589 were well-  
98 imputed by meta-imputation, followed by ex1KG with 1578 SNPs. On a genome-wide scale,  
99 imputation with 1KG38 resulted in the most well-imputed SNPs (8.02M), followed by meta-  
100 imputation (7.93M) and ex1KG (7.85M); for average  $R_{Est}^2$ , ex1KG is the best, followed by meta-

101 imputation and then 1KG38. Imputation with GenomeAsia-Pilot led to the fewest imputed and  
102 well-imputed SNPs (Figures 1b, 1e, 2b, 2c).

103 Overall, for common variants, balancing genomic coverage and imputation accuracy,  
104 meta-imputation had the best performance, followed by ex1KG which had the highest  
105 imputation accuracy but slightly fewer well-imputed variants (7.85M vs 7.93M). However, meta-  
106 imputation is computationally intensive and expensive in terms of both time and data storage,  
107 taking ~70 hours (and 328G disk space) compared to ~2 hours (and 87G) for ex1KG for the  
108 1814 Pakistani individuals in this study (Table S3).

109 We found that imputation quality was low for rarer variants ( $MAF < 1\%$ ) irrespective of  
110 the imputation reference panel used. However, for lower frequency variants with  $MAF$  between  
111 0.5% and 1%, average  $R_{True}^2$  and  $R_{Est}^2$  were acceptable ( $\geq 0.6$ ) for imputed SNPs using meta-  
112 imputation and/or ex1KG (Figs. 1a, 2a). When comparing against sequenced data, meta-  
113 imputation and ex1KG had the highest mean  $R_{True}^2$  for SNPs with  $MAF$  0.1% - 1% ( $p_{meta\ vs\ ex1KG} \geq$   
114 0.35, Figure 1a). On a genome-wide level, meta-imputation had the highest mean  $R_{Est}^2$  for SNPs  
115 with  $MAF$  0.05% -1%. For the lowest  $MAF$  category ( $MAF \leq 0.05\%$ ), findings were inconsistent:  
116 GenomeAsia-Pilot had the highest mean  $R_{True}^2$ , while 1KG38 had the highest mean  $R_{Est}^2$ , but  
117 both had poor imputation quality on an absolute scale (0.38 for GenomeAsia-Pilot  $R_{True}^2$ , 0.092  
118 for 1KG38  $R_{Est}^2$ ). It is likely that the mean  $R_{True}^2$  and  $R_{Est}^2$  for meta-imputation was diluted at the  
119 ultra-rare end due to its substantial number of poorly imputed rare variants ( $R_{Est}^2 < 0.8$ )  
120 compared to other imputation panels (Fig. S10).

121 Imputation coverage was also low for rare variants. Although meta-imputation and  
122 TOPMed imputation yielded 98.4%-99.4% of targeted sequencing rare variants (Figure 1c), this  
123 number drastically dropped when including only well-imputed SNPs (2.6%-2.9% of targeted  
124 sequencing variants, Figure 1f). Therefore, sequencing remains the best approach to retrieve  
125 high-quality genotypes for rare variants. Nonetheless, we still obtained a large absolute number

126 of high-quality genotypes for rare variants through imputation (e.g., 4.8M genome-wide rare  
127 variants via meta-imputation for Pakistani individuals). Across imputation panels, meta-  
128 imputation had the highest count of both imputed and well-imputed rare variants (286.9M, 4.8M  
129 respectively), followed by TOPMed (282.8M, 4.2M). 1KG37-SAS and GenomeAsia-Pilot had the  
130 fewest well-imputed variants (1.43M and 0.7M; Figs. 2b, 2c).

131 Overall, for rare variants, meta-imputation yielded the highest imputation quality and  
132 generated the highest count of well-imputed SNPs, followed by imputation with TOPMed.  
133 However, meta-imputation required ~70 hours of computational time, compared to ~5 hours for  
134 TOPMed for the 1814 Pakistani individuals (Table S3). Further, meta-imputation required  
135 ~328G of disk space, compared to ~150G using TOPMed. We do not recommend the current  
136 GenomeAsia-Pilot and 1KG37-SAS datasets for imputation of rare variants given the relatively  
137 low counts of well-imputed rare variants obtained.

138 Next, we tested whether SNPs with greater MAF differences between Pakistani and EUR  
139 populations had significant differences in imputation accuracy (measured by  $R_{True}^2$ ), since most  
140 reference panels included in this study are primarily of European origin (with the exception of  
141 GenomeAsia-Pilot). In fact, deviation from EUR MAF did not have a negative impact on SNP  
142 imputation quality (Figs. S11-13), across both common and rare variants. Since all the  
143 imputation panels included in this study have 0.1% - 6.5% sequenced individuals from Pakistan  
144 ( $n$  ranges from 113 to 146 for Pakistani individuals, and  $n$  ranges from 489 to 724 for SAS  
145 individuals in general; Table S1), this suggests that imputation quality is unlikely to be impaired by  
146 a large proportion of EUR ancestry in reference panels as long as there is some inclusion of  
147 individuals from the targeted population (11).

148 For comparison of coverage across different SNP categories, we mainly focused on well-  
149 imputed SNP counts since these are the ones typically included in GWAS (Figs. 2d-2i, S14-  
150 S15). For common variants, meta-imputation imputed the most SNVs (7.4M) whereas 1KG38  
151 imputed the most indels (780.8K) (Fig. 2d). Meta-imputation also produced the highest SNP

152 count in most of the SNP categories for common variants, including SNVs (7.4M, Fig. 2d),  
153 missense variants, non-coding transcript exonic variants, variants in splice region, and start/stop  
154 variants (Fig. 2g-2i), whereas 1KG38 produced the highest SNP count for indels (780.8K; Fig.  
155 2d), intronic variants, and upstream and downstream gene variants (Fig. 2f). For rare variants,  
156 meta-imputation produced the highest SNP counts across all categories, followed by TOPMed.  
157 Regardless of common or rare variants, imputation using GenomeAsia-Pilot produced the least  
158 number of well-imputed SNPs across different SNP types, with no imputed indel or multi-allelic  
159 variants. Notably, although far fewer high-quality rare variants are available through imputation  
160 panels compared to sequencing (Fig. 1f), on a genome-wide scale, current imputation panels  
161 still provide a substantial number of well-imputed rare variants across different SNP categories  
162 (Fig. 2d-2i) for further investigation. For example, meta-imputation generated 4.75 M well-  
163 imputed rare variants, including 29933 well-imputed rare missense variants (compared to 24616  
164 well-imputed common missense variants). Given high rate of consanguineous marriage  
165 increases the probability of homozygous rare variants, genetic studies of rare variants in the  
166 Pakistani population as well as other South Asian populations could provide valuable insights  
167 into genetic etiology of various diseases for future therapeutic development (5).

168 Together, our results imply that meta-imputation is currently the best choice for imputation of  
169 both common and rare SNPs in Pakistani individuals, taking into account both imputation  
170 accuracy and variant coverage. Other panels may also be appropriate; for example, ex1KG has  
171 high imputation accuracy for common variants, and lower computational demands, while  
172 TOPMed has high coverage of well-imputed rare variants. To address the question of whether  
173 sample size or ancestry matching matters more for imputation in the Pakistani population, our  
174 findings suggest that ancestry matters more for genetic imputation of common variants, as  
175 ex1KG outperformed TOPMed for the number of well-imputed common SNPs (7.85M vs 7.37M,  
176 Figs. 1e, 2c) with a smaller total sample size ( $N_{\text{ex1KG}} = 3202$  vs  $N_{\text{TOPMed}} = 97256$ ) but a larger  
177 Pakistani-specific sample size ( $N_{\text{ex1KG}} = 146$  vs  $N_{\text{TOPMed}} = 139$ ). For rare variants, while whole

178 genome sequencing remains the gold standard to obtain a large number of rare variants, the  
179 absolute number of well-imputed SNPs genome-wide by imputation is still massive (>4M for  
180 TOPMed and meta-imputation, Fig. 2c) and more cost-friendly compared to whole genome  
181 sequencing (on a relative scale of \$100 vs \$1000 per sample). While sample size is important to  
182 increase the likelihood of finding certain rare variants in the population, ancestry is also  
183 important for Pakistani-specific rare variants given the high rate of consanguineous marriages  
184 (12). As GWAS diversity initiatives gain momentum in the recent years, it is crucial to explore  
185 the impact of reference panel ancestry and sample size on imputation. Our study highlighted the  
186 significance of these factors in the context of genetic research diversification using the Pakistani  
187 population as a case study.

188 Further, although the GenomeAsia-Pilot had lower performance amongst all the imputation  
189 panels tested in this study, a future release of its whole reference panel of 100K (9), assuming  
190 6.5% of Pakistani individuals, would provide the largest Pakistani-specific imputation panel  
191 (estimated N = 6500 *versus* ex1KG which has 146 Pakistani individuals, Table S1). In addition,  
192 with the option of meta-imputation, imputation power could be further improved by meta-  
193 imputing the future release of GenomeAsia with other large panels (e.g., TOPMed). Another  
194 alternative approach to improve imputation accuracy while controlling the sequencing cost in the  
195 future is to sequence a subset of population-specific individuals and meta-impute with other  
196 large reference panels (13).

197

## 198 **Conclusions**

199 In this study, we evaluated imputation performance of various imputation panels in the Pakistani  
200 population for the first time. Overall, we found meta-imputation to have the highest genome-  
201 wide imputation accuracy for rare variants whereas ex1KG had the highest genome-wide  
202 imputation accuracy for common variants. Balancing imputation quality with genomic coverage,  
203 our study shows that meta-imputation of TOPMed and ex1KG is the best for imputation of both



204 rare and common variants in Pakistani individuals when the computational resources are not  
205 limited. Otherwise, we recommend TOPMed for rare variant imputation and ex1KG for common  
206 variant imputation. Further, this study suggests that SNPs with MAF deviated from EUR MAF  
207 did not have reduced imputation quality in Pakistani individuals. Increased European sample  
208 sizes in imputation reference panels seem unlikely to increase imputation accuracy in non-  
209 Europeans; we found the ex1KG panel, with fewer overall individuals but more Pakistani  
210 individuals, outperformed the overall larger TOPMed panel for common variants. Taken together,  
211 our study supports the importance of including more diverse populations into the current  
212 repertoire of human genome reference panels for future genetic research.

213

## 214 **Methods**

### 215 Study Subjects

216 The Pakistani individuals included in this study were collected as pilot in preparation for the  
217 Genetics of Schizophrenia in Pakistan (GEN-SCRIP) Study. The samples were collected by  
218 Lahore Institute of Research and Development and University of Peshawar. The diagnoses  
219 were made based on clinician's interview according to the Diagnostic and Statistical Manual of  
220 Mental Disorders IV. The study was approved by the Institutional Review Board (IRB)  
221 committee at University of Peshawar in Pakistan, the IRB of Lahore Institute of Research and  
222 Development and IRB of University of Health Sciences Lahore.

223

### 224 Genotyping and Quality Control

225 The Infinium™ Global Screening Array-24 v3.0 BeadChip (Illumina Inc., California, USA) was  
226 used for genotyping of the Pakistani individuals. Genotyping was performed at the Genomic  
227 Core Facility of Icahn School of Medicine at Mount Sinai. The MoChA pipeline was used on  
228 Google Cloud to convert the Illumina genotype intensity files (.idat) to VCF files via Illumina  
229 GenomeStudio (14,15) (Fig. S1, Supplemental methods). Genetic variants with GenTrain score

230 < 0.4 and cluster separation score < 0.3 were excluded to remove variants with poor genotype  
231 cluster separation (Figs. S2, S3). Quality control (QC) was then performed using PLINK (16). At  
232 the SNP level, we removed SNPs with low call rate (<0.95), duplicated SNPs with a lower call  
233 rate, and those with low minor allele frequency (MAF < 0.001) (Figs. S2, S3). Additionally, given  
234 that Pakistan has a tradition of consanguineous marriages which could result in a high level of  
235 autozygosity in the population, we also excluded variants that deviate from Hardy-Weinberg  
236 Equilibrium (HWE,  $p < 1 \times 10^{-6}$ ) only in individuals with low autozygosity (Fig. S3) (4). Low  
237 autozygosity is defined as an individual's consanguinity coefficient  $F_{ROH}$  less than 0.5% (4) ( $F_{ROH}$   
238 =  $\sum L_{ROH} / L_{genome}$ , where  $L_{ROH}$  is the sum of the length of all runs of homozygosity (ROH)  
239 detected in a subject, and  $L_{genome}$  is the total length of the human genome, estimated to be  
240 2772.7 megabases (17)). ROH was called via the PLINK command `---homozyg` on a pruned set  
241 of common autosomal SNPs with pair-wise correlation <0.8 (`--indep-pairwise 50 10 0.8, --maf`  
242 0.01). At the individual level, we removed samples with high missingness (>5%) and high  
243 heterozygosity ( $F_{het} < 0.23$  or  $> 0.33$ , Figs. S2, S4), individuals with a lower call rate for  
244 duplicated sample pairs, related individuals (3<sup>rd</sup> degree or closer with a kinship coefficient >  
245 0.088; those with the highest call rate were retained), those with ambiguous sex ( $0.2 < F$   
246 estimate < 0.8), and any samples indicative of swap/mismatch issues (Figs. S2, S4). After the  
247 thorough QC, a total of 520,234 variants were retained for 1814 Pakistani samples for phasing  
248 (Fig. S2). In addition, the principal component analysis (PCA) was constructed, and all study  
249 subjects were confirmed to have South Asian ancestry (Fig. S5).

250

### 251 Phasing and Imputation

252 Phasing was performed based on the 1000 Genome Project Phase 3 GRCh38 reference panel  
253 (8) using SHAPEIT4 via the MoChA pipeline on Google Cloud (14,15) to generate phased vcf  
254 files (Fig. S1, Supplemental methods). The MoChA pipeline has its default filtering steps to  
255 exclude SNPs with more than 3% missingness and SNPs with excess heterozygosity (i.e.,

256  $p < 1 \times 10^{-6}$  in a HWE test) before the phasing process. Next, we uploaded the sorted  
257 chromosome-separated phased VCF files to the TOPMed and Michigan imputation servers (18)  
258 for imputation via Minimac4 version 1.7.3. The imputation reference panels evaluated in this  
259 study include TOPMed (GRCh38) (6), ex1KG (GRCh38) (7), 1KG38 (GRCh38) (8), 1KG37-SAS  
260 (GRCh37) (8) and GenomeAsia-Pilot (GRCh37) (9). The sample size, in particular SAS and  
261 Pakistani sample size, in each imputation panel as well as the mean read depth are included in  
262 Table S1.

263 In addition, we performed meta-imputation using both TOPMed and ex1KG imputed  
264 results through the MetaMinimac2 tool, which was designed to improve imputation performance  
265 by statistically combined imputed results from different reference panels without the need to  
266 physically merging the imputation panels together (19). Since meta-imputation can only run on  
267 imputed results of the same genome build, we selected TOPMed (GRCh38) and ex1KG  
268 (GRCh38) for meta-imputation, given that TOPMed is currently the largest imputation reference  
269 panel whereas ex1KG has the largest sample size of Pakistani individuals (Table S1). An  
270 overview of the study design for this paper is outlined in Fig. S1.

271

## 272 Targeted Sequencing

273 Besides genotyping on SNP arrays, targeted sequencing of 49234 exonic variants on 161  
274 genes on 22 autosomal chromosomes was also performed in these Pakistani individuals, using  
275 the Ion Torrent platform at Sema4, Inc. (Mount Sinai Genomics Inc., Connecticut, USA) with an  
276 average sequencing depth of 224x (20). The Ion AmpliSeq technology was used to create the  
277 sequencing library, in which the amplicons for the 161 genes were designed using Ion AmpliSeq  
278 Designer version 6.13. Individual genotype called from the targeted sequencing was considered  
279 as the true genotype to assess the accuracy of imputed genotype using different imputation  
280 reference panels. The detailed QC of the targeted sequencing data is described elsewhere (20).

281

282 Imputation accuracy evaluation

283 True R-square: The true  $R^2$  ( $R_{True}^2$ ) is the squared correlation between the imputed genotype  
284 dosage and the sequenced genotype. It is considered as the most robust measure to assess  
285 the imputation accuracy given it is based on comparison against directly measured genotype  
286 from targeted sequencing with rich read depth (mean: 224x), compared to the mean read depth  
287 used for included imputation reference panels (7.4x to 38.2x, Table S1). Theoretically,  $R_{True}^2 = 1$   
288 indicates that the imputed genotypes are the same as the sequenced genotypes, and therefore  
289 a  $R_{True}^2$  value closer to 1 suggests a higher imputation accuracy.  $R_{True}^2$  was calculated for each  
290 individual SNP by the aggRSquare tool (19) and averaged across the default MAF bins in the  
291 aggRSquare tool, including MAF cutoffs of 0.0005, 0.001, 0.002, 0.005, 0.010, 0.015, 0.020,  
292 0.035, 0.05, 0.1, 0.2, 0.3, 0.4, and 0.5. Given we only have targeted sequencing data for exonic  
293 variants of 161 genes, the  $R_{True}^2$  can only be evaluated on a subset of genome-wide SNPs on  
294 the 22 autosomal chromosomes (n=49234).

295

296 Estimated R-square: Without sequenced genotypes as a gold standard reference,  $R^2$  may be  
297 estimated ( $R_{Est}^2$ ) based on their posterior allele probabilities for each imputed SNP on a  
298 genome-wide scale (Table S2). Calculation of  $R_{Est}^2$  is an embedded function in the Minimac tool  
299 used by the online imputation server (11) as well as in the MetaMinimac2 tool for meta-  
300 imputation (19). When Hardy Weinberg equilibrium holds (11),  $R_{Est}^2$  is equivalent to the INFO  
301 score produced by the IMPUTE software (21), another imputation quality score frequently used  
302 for SNP QC for GWAS.  $R_{Est}^2$  may be less accurate than  $R_{True}^2$  when there are insufficient  
303 samples for imputation (11), and/or when the SNPs are rare (correlation with  $R_{True}^2$  dropped to  
304 0.72-0.77 for rare variants across imputation panels, Fig. S6). Well-imputed SNPs in this study  
305 are defined as  $R_{Est}^2 \geq 0.8$ .

306 To test whether  $R_{Est}^2$  is an appropriate proxy for  $R_{True}^2$  in our study, we calculated  
307 imputation accuracy for SNPs with high  $R_{Est}^2$  ( $\geq 0.8$ ), a filter often applied in GWAS, and  
308 observed a corresponding improvement in  $R_{True}^2$  across MAF, with most mean  $R_{True}^2 \geq 0.8$   
309 across different MAF bins (Figure 1d; correlation of  $R_{True}^2$  and  $R_{Est}^2 = 0.82-0.86$ , Fig. S6),  
310 confirming that  $R_{Est}^2$  can be used as a proxy for  $R_{True}^2$  when there is no sequencing data available  
311 to serve as reference (Fig. S7).

312

313 Empirical R-Square: Empirical  $R^2$  ( $R_{Emp}^2$ ) is the squared correlation between the imputed  
314 genotype dosage and the directly measured genotype on the GSA array. Imputed SNP dosages  
315 of these genotyped loci were calculated by masking the measured genotype as if they were  
316 unknown and then imputing these SNPs. Therefore,  $R_{Emp}^2$  can be calculated only for SNPs  
317 directly genotyped on the GSA array (i.e., nearly 500K SNPs) (Table S2). The  $R_{Emp}^2$  calculation  
318 is included in Minimac, but not in the MetaMinimac2 tool for meta-imputation (19).  $R_{Emp}^2$  was not  
319 strongly correlated with  $R_{Est}^2$  ( $r = 0.43-0.54$  across imputation panels, Figs. S8-S9) and therefore  
320 it is a less accurate measure for imputation accuracy, compared to  $R_{Est}^2$ , which has a high  
321 correlation with  $R_{True}^2$ . Table S4 explains the difference between the three types of  $R^2$ .

322

### 323 SNP type

324 In this study, we defined rare variants as  $MAF < 0.01$ , and common if  $MAF \geq 0.01$ . The  
325 distinction between single nucleotide variant (SNV) and insertion-deletions (indel) was based on  
326 the number of nucleotides at one locus (i.e., if both reference and alternate alleles are single  
327 nucleotides, then it was classified as a SNV; if any of the alleles had  $> 1$  nucleotide, it was  
328 classified as an indel). We used SnpEff to functionally annotate all the imputed variants (22).  
329 For imputed data using the GenomeAsia-Pilot and 1KG37-SAS panels, the GRCh37.75 version

330 of the pre-built human database was used for annotation, whereas for imputed data using other  
331 imputation panels, the GRCh38.99 version was used.

332

### 333 Statistical analyses

334 To compare imputation accuracy across different imputation panels at each MAF bin, we used  
335 the Kruskal-Wallis rank sum test for significance testing, which is a non-parametric test of one-  
336 way ANOVA when ANOVA assumptions (i.e., homogeneity of variance and normality) are not  
337 met. Further, to test for pairwise significance, we applied a pairwise t test without assuming  
338 equal variance in the two groups, setting two-sided nominal significance at 0.05 for all statistical  
339 analyses, while Bonferroni correction was applied to correct for multiple testing to reduce false  
340 positive findings (e.g., Bonferroni-corrected significance set at  $P_{\text{Bonferroni}} = 0.05/15 = 0.003$  for  
341 pairwise comparison across 6 imputation panels). To evaluate whether SNPs with allele  
342 frequency (AF) deviated from EUR AF would have lower imputation quality, we performed linear  
343 regressions between true  $R^2$  and the absolute difference of AF using SAS AF based on targeted  
344 sequencing and 1000G-based EUR AF. All analyses were conducted in the R statistical  
345 software (version 4.2.0, Vienna, Austria).

346

347

348

349

350

351

352

353

354 **Declarations**

355 Ethics approval and consent to participate: Interviewers at the hospitals/enrollment centers from  
356 Pakistan collected informed consent from the participants. The study was approved by the  
357 Ethics committee at University of Peshawar, University of Health Sciences, Lahore and Lahore  
358 Institute of Research and Development in Pakistan.

359  
360 Availability of data and materials: Datasets used in this study are not publicly available because  
361 it contains private patient data in Pakistan, but they are available from the corresponding author  
362 on request. The source code for the analyses is available and deposited in GitHub  
363 (<https://github.com/xuj18/>).

364  
365 Competing interests: The authors declare no competing interests.

366  
367 Funding: J.X. and L.M.H. are both supported by the National Institute of Mental Health grant  
368 R01MH118278. L.M.H. also acknowledges funding from NIMH (R01MH124839, RM1MH132648,  
369 R01MH125938) and National Institute of Environmental Health Sciences (R01ES033630). D.L.,  
370 B.F., E.C., and A.W.C. were supported for this work by NIH R01MH109536. A.H., J.A.K., M.A.,  
371 and T.B.B. are supported by NIMH grants R01MH112904 and R01MH123775. T.B.B. and G.G.  
372 were both supported by R01MH123451. G.G. was also supported for this work by NIH  
373 R01MH104964. R.E.P., T.B.B., and L.M.H. are supported by NIMH grant R01MH125938. R.E.P.  
374 also received support from the Brain & Behavior Research Foundation NARSAD grant 28632  
375 PS Fund. The funding body is not involved in the study design, data collection, data analysis,  
376 result interpretation, and writing of the manuscript.

377  
378 Author contributions: J.X. analyzed the data and drafted the manuscript for this study. J.X.,  
379 R.E.P., T.B.B., and L.M.H. conceptualized and designed the study. J.X. and L.M.H. revised the

380 manuscript. A.H., J.A.K., and M.A. initiated the GEN-SCRIP study and collected data including  
381 blood samples from the study participants in Pakistan. D.L., B.F., E.C., and A.W.C. contributed  
382 to the production of both genotyping and targeted sequencing data for these Pakistani  
383 individuals. D.L. provided targeted sequencing data with quality control for the analysis in this  
384 manuscript. G.G. provided consultation on the use of MoChA pipeline. A.C.C. contributed to  
385 figure production in this manuscript. All authors read and approved the final manuscript for  
386 submission.

387

388 Acknowledgement: This work was supported in part through the computational resources and  
389 staff expertise provided by Scientific Computing at the Icahn School of Medicine at Mount Sinai.  
390 Research reported in this paper was supported by the Office of Research Infrastructure of the  
391 National Institutes of Health under award number S10OD018522 and S10OD026880. The  
392 content is solely the responsibility of the authors and does not necessarily represent the official  
393 views of the National Institutes of Health. We would also like to thank Dr. Ketian Yu in the  
394 Department of Biostatistics at University of Michigan-Ann Arbor for her technical assistance with  
395 the MetaMinimac2 tool and the aggRSquare tool.

396

397

398

399

400

401

402

403

404

405



## 406 References

- 407 1. Marchini J, Howie B. Genotype imputation for genome-wide association studies. *Nat Rev*  
408 *Genet.* 2010 Jul;11(7):499–511.
- 409 2. Mills MC, Rahal C. A scientometric review of genome-wide association studies. *Commun Biol.*  
410 2019 Jan 7;2(1):1–11.
- 411 3. Peterson RE, Kuchenbaecker K, Walters RK, Chen CY, Popejoy AB, Periyasamy S, et al.  
412 Genome-wide Association Studies in Ancestrally Diverse Populations: Opportunities,  
413 Methods, Pitfalls, and Recommendations. *Cell.* 2019 Oct 17;179(3):589–603.
- 414 4. Huang QQ, Sallah N, Dunca D, Trivedi B, Hunt KA, Hodgson S, et al. Transferability of  
415 genetic loci and polygenic scores for cardiometabolic traits in British Pakistani and  
416 Bangladeshi individuals. *Nat Commun.* 2022 Aug 9;13(1):4664.
- 417 5. Wall JD, Sathirapongsasuti JF, Gupta R, Rasheed A, Venkatesan R, Belsare S, et al. South  
418 Asian medical cohorts reveal strong founder effects and high rates of homozygosity. *Nat*  
419 *Commun.* 2023 Jun 8;14(1):3377.
- 420 6. Taliun D, Harris DN, Kessler MD, Carlson J, Szpiech ZA, Torres R, et al. Sequencing of  
421 53,831 diverse genomes from the NHLBI TOPMed Program. *Nature.* 2021  
422 Feb;590(7845):290–9.
- 423 7. Byrska-Bishop M, Evani US, Zhao X, Basile AO, Abel HJ, Regier AA, et al. High-coverage  
424 whole-genome sequencing of the expanded 1000 Genomes Project cohort including 602 trios.  
425 *Cell.* 2022 Sep 1;185(18):3426–3440.e19.
- 426 8. Auton A, Abecasis GR, Altshuler DM, Durbin RM, Abecasis GR, Bentley DR, et al. A global  
427 reference for human genetic variation. *Nature.* 2015 Oct;526(7571):68–74.
- 428 9. Wall JD, Stawiski EW, Ratan A, Kim HL, Kim C, Gupta R, et al. The GenomeAsia 100K  
429 Project enables genetic discoveries across Asia. *Nature.* 2019 Dec;576(7785):106–11.
- 430 10. TOPMed Imputation Server [Internet]. [cited 2023 May 16]. Available from:  
431 <https://imputation.biodatacatalyst.nhlbi.nih.gov/#!/pages/about>
- 432 11. Das S, Abecasis GR, Browning BL. Genotype Imputation from Large Reference Panels.  
433 *Annual Review of Genomics and Human Genetics.* 2018;19(1):73–96.
- 434 12. Anwar I, Taroni F. Genetic peopling of Pakistan: Influence of consanguinity on  
435 population structure and forensic evaluation of traces. *Forensic Science International:*  
436 *Genetics Supplement Series.* 2019 Dec 1;7(1):232–3.
- 437 13. Quick C, Anugu P, Musani S, Weiss ST, Burchard EG, White MJ, et al. Sequencing and  
438 imputation in GWAS: Cost-effective strategies to increase power and genomic coverage  
439 across diverse populations. *Genetic Epidemiology.* 2020;44(6):537–49.
- 440 14. Loh PR, Genovese G, Handsaker RE, Finucane HK, Reshef YA, Palamara PF, et al.  
441 Insights into clonal haematopoiesis from 8,342 mosaic chromosomal alterations. *Nature.*  
442 2018 Jul;559(7714):350–5.

- 443 15. Genovese G. The MOsaic CHromosomal Alterations (MoChA) WDL Pipeline [Internet].  
444 2023 [cited 2023 May 15]. Available from: <https://github.com/freeseek/mochawdl>
- 445 16. Purcell S, Neale B, Todd-Brown K, Thomas L, Ferreira MAR, Bender D, et al. PLINK: A  
446 Tool Set for Whole-Genome Association and Population-Based Linkage Analyses. *Am J Hum*  
447 *Genet.* 2007 Sep;81(3):559–75.
- 448 17. Christofidou P, Nelson CP, Nikpay M, Qu L, Li M, Loley C, et al. Runs of Homozygosity:  
449 Association with Coronary Artery Disease and Gene Expression in Monocytes and  
450 Macrophages. *The American Journal of Human Genetics.* 2015 Aug 6;97(2):228–37.
- 451 18. Das S, Forer L, Schönherr S, Sidore C, Locke AE, Kwong A, et al. Next-generation  
452 genotype imputation service and methods. *Nat Genet.* 2016 Oct;48(10):1284–7.
- 453 19. Yu K, Das S, LeFaive J, Kwong A, Pleiness J, Forer L, et al. Meta-imputation: An  
454 efficient method to combine genotype data after imputation with multiple reference panels.  
455 *The American Journal of Human Genetics.* 2022 Jun 2;109(6):1007–15.
- 456 20. Liu D, Meyer D, Fennessy B, Feng C, Cheng E, Johnson JS, et al. Schizophrenia risk  
457 conferred by rare protein-truncating variants is conserved across diverse human populations.  
458 *Nat Genet.* 2023 Mar;55(3):369–76.
- 459 21. Howie BN, Donnelly P, Marchini J. A Flexible and Accurate Genotype Imputation Method  
460 for the Next Generation of Genome-Wide Association Studies. *PLOS Genetics.* 2009 Jun  
461 19;5(6):e1000529.
- 462 22. Cingolani P, Platts A, Wang LL, Coon M, Nguyen T, Wang L, et al. A program for  
463 annotating and predicting the effects of single nucleotide polymorphisms, SnpEff. *Fly (Austin).*  
464 2012 Apr 1;6(2):80–92.

465

466

467

468

469

470

471

472

473

474

475



492 with high  $R_{Est}^2$  also have high  $R_{True}^2$  values (average  $\geq 0.65$ ), suggesting the appropriateness of  
493 using  $R_{Est}^2$  as a proxy for  $R_{True}^2$  when there is no sequencing data available as the gold standard  
494 reference; e) The number of well-imputed common variants by different imputation panels  
495 compared against targeted sequencing; f) The number of well-imputed rare variants (defined as  
496  $R_{Est}^2 \geq 0.8$ ) by different imputation panels compared against targeted sequencing. Abbreviation:  
497 1000G, 1000 Genomes; MAF, minor allele frequency; SAS, South Asian ancestry; SNP, single  
498 nucleotide polymorphism.

It is made available under a [CC-BY-NC-ND 4.0 International license](https://creativecommons.org/licenses/by-nc-nd/4.0/).

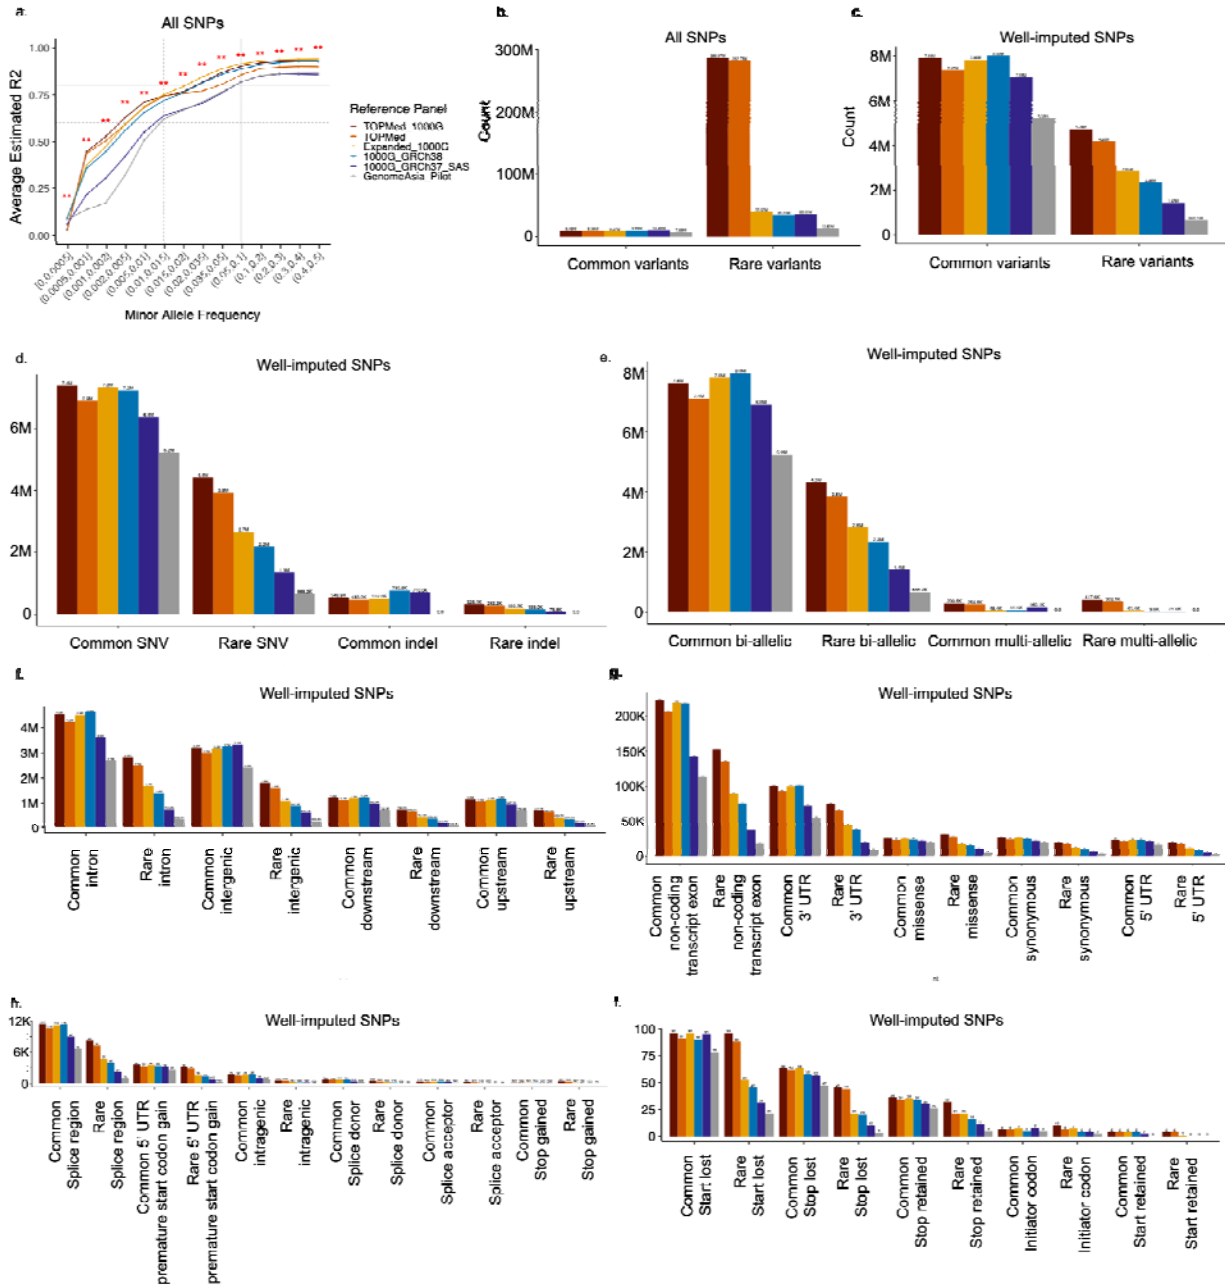

499  
 500 **Figure 2. Genome-wide imputation accuracy and coverage in the Pakistani individuals. a)**  
 501 Imputation accuracy of different imputation panels measured by  $R^2$ , which is the squared  
 502 correlation between imputed genotype dosage and true genotype based on posterior allele  
 503 probabilities. A  $R^2$  value closer to 1 indicates higher imputation accuracy. Significance: \*  
 504 indicates a nominally significant difference in the mean  $R^2$  across different imputation panels  
 505 (Kruskal-Wallis rank sum test  $P < 0.05$ ) at a specific MAF bin; \*\* denotes a Bonferroni-corrected

506 significant difference ( $P < 0.003$ , correcting for the number of pairwise panels tested). The  
507 horizontal grey lines indicate  $R_{Est}^2$  of 0.6 (dashed line, indicating fairly high imputation quality)  
508 and 0.8 (solid line, indicating high imputation quality). The vertical grey lines indicate  $MAF > 1\%$   
509 (dashed line) and  $> 5\%$  (solid line); b) The number of imputed SNPs genome-wide by  
510 common/rare variants; c) The number of well-imputed SNPs ( $R_{Est}^2 \geq 0.8$ ) genome-wide by  
511 common/rare variants; d) The number of well-imputed SNPs genome-wide by common/rare and  
512 SNV/indel status; e) The number of well-imputed SNPs genome-wide by common/rare and bi-  
513 allelic/multi-allelic status; f-i) The number of well-imputed SNPs genome-wide by common/rare  
514 status and SNP types via functional annotation; f) includes 4 SNP types with the highest SNP  
515 counts (i.e., intron, intergenic, downstream, upstream); g) includes 5 SNP types with following  
516 highest SNP counts (i.e., non-coding transcript exon, 3' UTR, missense, synonymous, 5' UTR);  
517 h) includes 6 SNP types with low SNP counts (i.e., splice region, 5' UTR premature start codon  
518 gain, intragenic, splice donor, splice acceptor, stop gained); i) includes 5 SNP types with ultra-  
519 low SNP counts (i.e., start lost, stop lost, stop retained, initiator codon, start retained).  
520 Abbreviation: 1000G, 1000 Genomes; indel, insertion-deletion; MAF, minor allele frequency;  
521 SAS, South Asian ancestry; SNP, single nucleotide polymorphism; SNV, single nucleotide  
522 variant; UTR, untranslated region.
